# Supplementary material
Source: PubMed Central journal article supplement (PMC5836115)
Supplement: supp_RA117.001231_134301_1_supp_55332_p2lwlr.pdf [file supp_RA117.001231_134301_1_supp_55332_p2lwlr.pdf]

Supporting information

The phospholipid-repair system LpIT/Aas in Gram-negative bacteria protects the bacterial membrane envelope from host phospholipase A<sub>2</sub> attack

**Yibin Lin<sup>\*</sup>, Mikhail Bogdanov<sup>#</sup>, Shuo Lu<sup>\*</sup>, Ziqiang Guan<sup>\*\*</sup>, William Margolin<sup>##</sup>, Jerrold Weiss<sup>\*\*\*</sup>,  
Lei Zheng<sup>\*</sup>**

From the Center for Membrane Biology, Department of Biochemistry and Molecular Biology, the  
University of Texas Health Science Center at Houston McGovern Medical School<sup>\*</sup>  
Department of Biochemistry and Molecular Biology, University of Texas McGovern Medical School<sup>#</sup>  
Department of Biochemistry, Duke University School of Medicine<sup>\*\*</sup>  
Department of Microbiology and Molecular Genetics, University of Texas McGovern Medical School<sup>##</sup>  
Inflammation Program and Departments of Internal Medicine and Microbiology, University of  
Iowa Carver College of Medicine<sup>\*\*\*</sup>

**Content:**

- I. Table S1-S2
- II. Figures S1-S9

## I. Tables

**Table S1. Primer sequences used in this study**

| Primers               | Sequences (5' – 3')*                                                                      |
|-----------------------|-------------------------------------------------------------------------------------------|
| lplT-knockout-forward | <u>GTGAGTCAGTGCACACTAACACTTCGTTGTGGTCGAAGGGGATGAA</u><br><u>AGCGATGGGAATTAGCCATGGTCC</u>  |
| lplT-knockout-reverse | <u>GCCAATGCCAATGGGCACGACCGGGATGCCTATCATTACCGCCAGC</u><br><u>GAGTGTAGGCTGGAGCTGCTTCG</u>   |
| aas-knockout-forward  | <u>AATCTCCCTCCATTCGCTTTTACTGAATCAGAGCAAAGGGAGTTGGA</u><br><u>ATGATGGGAATTAGCCATGGTCC</u>  |
| aas-knockout-reverse  | <u>GCATTCGCCAGCGATTTTGCACGGTACGGGCACGCGGCATCC</u><br><u>GGTGTAGGCTGGAGCTGCTTCG</u>        |
| lplT-Kn-ccdb-forward  | <u>GATGAGTGAGTCAGTGCACACTAACACTTCGTTGTGGTCGAAGGGG</u><br><u>ATGATAGGAACTTCAAGATCC</u>     |
| lplT-Kn-ccdb-reverse  | <u>CGGCGCTGCCAGATCCACAGCGCCGTTATTGCCAGCGCAAACAGCG</u><br><u>CACCTTATATTCCCAGAACATCAGG</u> |
| aas-Kn-ccdb-forward   | <u>AATCTCCCTCCATTCGCTTTTACTGAATCAGAGCAAAGGGAGTTGGA</u><br><u>ATGATAGGAACTTCAAGATCC</u>    |
| aas-Kn-ccdb-reverse   | <u>CAGCCCTTTTACCCCGGCAGTGTAGTTCATCATTGCGGGCATGCGGC</u><br><u>GACTTATATTCCCAGAACATCAGG</u> |
| aas-H36A-forward      | CGTTCTAATTACGCCTAAT <b>GC</b> CGTCTCTTTTATTGATGG                                          |
| aas-H36A-reverse      | CCATCAATAAAAGAGACG <b>GC</b> ATTAGGCGTAATTAGAACG                                          |
| lplT-D30A-forward     | CTGCGTTTGGCG <b>C</b> TAATGCCCTACTG                                                       |
| lplT-D30A-reverse     | CAGTAGGGCATTAG <b>GC</b> GCCAAACGCAG                                                      |
| lplT-knockin-forward  | ATGAGTGAGTCAGTGCACACTAACACTTCG                                                            |
| lplT-knockin-reverse  | TTAATGACGGCGCTGCCAGATCCACAGCG                                                             |
| aas-knockin-forward   | ATGCTTTTTAGCTTTTTTCGAAATTTG                                                               |
| aas-knockin-reverse   | CATCGTGTGTTCCGCTTCGTCTACC                                                                 |

\* Bold red letters show the nucleotides mutated. Underlined letters represent the homologue arms

**Table S2. PL compositions in psPLA<sub>2</sub>-treated *E. coli* W3110 WT,  $\Delta lplT$ ,  $\Delta aas$  and  $\Delta aas/lplT$  cells\***

| Strain          | Treatment                       | Time (min) | CL    | PE    | PG    | MCL   | LPE   | LPG   |
|-----------------|---------------------------------|------------|-------|-------|-------|-------|-------|-------|
| <b>W3110</b>    | + AF                            | 0          | 7.54  | 66.25 | 18.62 | 3.58  | 2.2   | 1.81  |
|                 |                                 | 10         | 7.55  | 66.99 | 18.51 | 3.43  | 1.9   | 1.69  |
|                 |                                 | 20         | 7.53  | 67.08 | 18.66 | 3.33  | 1.79  | 1.6   |
|                 |                                 | 30         | 7.85  | 67.52 | 18.12 | 3.29  | 1.68  | 1.54  |
|                 |                                 | 60         | 7.66  | 67.51 | 18.4  | 3.2   | 1.67  | 1.57  |
|                 |                                 | 120        | 7.82  | 67.56 | 18.37 | 3.07  | 1.61  | 1.48  |
| <b>W3110</b>    | + AF<br>+<br>psPLA <sub>2</sub> | 0          | 7.94  | 65.25 | 19.39 | 3.55  | 2.18  | 3.87  |
|                 |                                 | 10         | 6.95  | 67.85 | 18.21 | 3.28  | 1.34  | 3.71  |
|                 |                                 | 20         | 7.21  | 67.12 | 18.38 | 3.41  | 1.58  | 3.88  |
|                 |                                 | 30         | 7.39  | 67.49 | 19.56 | 3.32  | 1.95  | 2.24  |
|                 |                                 | 60         | 6.96  | 67.96 | 18.28 | 3.21  | 1.38  | 3.59  |
|                 |                                 | 120        | 7.32  | 67.49 | 18.99 | 3.24  | 1.36  | 2.96  |
| $\Delta lplT$   | + AF                            | 0          | 8.96  | 57.88 | 19.66 | 4.76  | 3.58  | 5.17  |
|                 |                                 | 10         | 9.3   | 57.71 | 19.33 | 4.91  | 3.43  | 5.31  |
|                 |                                 | 20         | 9.22  | 58.18 | 19.32 | 4.66  | 3.38  | 5.24  |
|                 |                                 | 30         | 9.03  | 58.16 | 19.36 | 4.82  | 3.44  | 5.2   |
|                 |                                 | 60         | 8.93  | 58.17 | 19.4  | 4.65  | 3.4   | 4.86  |
|                 |                                 | 120        | 8.74  | 59.05 | 19.36 | 4.79  | 3.3   | 4.75  |
| $\Delta lplT^*$ | + AF<br>+<br>psPLA <sub>2</sub> | 0          | 7.61  | 64.58 | 18.82 | 3.36  | 3.07  | 2.56  |
|                 |                                 | 10         | 12.46 | 52.14 | 9.51  | 3.76  | 16.23 | 5.9   |
|                 |                                 | 20         | 14.77 | 45.63 | 4.31  | 6.94  | 22.3  | 6.03  |
|                 |                                 | 30         | 13.48 | 44    | 4.11  | 10.88 | 21.65 | 5.88  |
|                 |                                 | 60         | 12.54 | 41.77 | 4.5   | 14.43 | 18.23 | 8.52  |
|                 |                                 | 120        | 11.02 | 38.26 | 6.21  | 20.68 | 12.51 | 11.32 |
| $\Delta aas$    | + AF                            | 0          | 7.7   | 60.06 | 21.98 | 3.53  | 2.81  | 3.92  |
|                 |                                 | 10         | 5.29  | 62.2  | 24.21 | 2.9   | 2.56  | 2.84  |
|                 |                                 | 20         | 4.99  | 63.55 | 25.02 | 2.5   | 1.97  | 1.99  |
|                 |                                 | 30         | 5.2   | 65.71 | 23.82 | 2.03  | 1.71  | 1.53  |
|                 |                                 | 60         | 5.63  | 65.3  | 24.12 | 1.97  | 1.48  | 1.5   |
|                 |                                 | 120        | 6.28  | 64.62 | 23.74 | 2.17  | 1.53  | 1.66  |
| $\Delta aas$    | + AF<br>+<br>psPLA <sub>2</sub> | 0          | 10.76 | 50.74 | 16.52 | 7.46  | 7.28  | 7.24  |
|                 |                                 | 10         | 11.58 | 48.11 | 10.21 | 6.79  | 15.64 | 7.67  |
|                 |                                 | 20         | 13.11 | 42.21 | 6.62  | 9.48  | 20.27 | 8.32  |
|                 |                                 | 30         | 12.41 | 39.62 | 7.1   | 12.51 | 19.23 | 9.13  |
|                 |                                 | 60         | 12.36 | 36.53 | 8.31  | 15.02 | 16.97 | 10.82 |
|                 |                                 | 120        | 12.21 | 32.7  | 9.85  | 18.26 | 13.52 | 13.46 |

|                  |                                 |     |       |       |       |       |       |       |
|------------------|---------------------------------|-----|-------|-------|-------|-------|-------|-------|
| <i>Δaas/lpIT</i> | + AF                            | 0   | 8.91  | 58.36 | 22.55 | 3.78  | 2.8   | 3.61  |
|                  |                                 | 10  | 10    | 59.67 | 21.66 | 3.3   | 2.39  | 2.98  |
|                  |                                 | 20  | 8.28  | 59.11 | 25.08 | 2.89  | 2.07  | 2.58  |
|                  |                                 | 30  | 8.53  | 59.19 | 25.39 | 2.49  | 2.08  | 2.32  |
|                  |                                 | 60  | 10.56 | 55.8  | 23.51 | 3.57  | 3.26  | 3.29  |
|                  |                                 | 120 | 11.48 | 56.87 | 22.41 | 3.1   | 2.95  | 3.18  |
| <i>Δaas/lpIT</i> | + AF<br>+<br>psPLA <sub>2</sub> | 0   | 10.76 | 50.74 | 16.52 | 2.46  | 2.28  | 2.24  |
|                  |                                 | 10  | 11.58 | 48.11 | 10.21 | 6.79  | 15.64 | 7.67  |
|                  |                                 | 20  | 13.11 | 42.21 | 6.62  | 9.48  | 20.27 | 8.32  |
|                  |                                 | 30  | 12.41 | 39.62 | 7.1   | 12.51 | 19.23 | 9.13  |
|                  |                                 | 60  | 12.36 | 36.53 | 8.31  | 15.02 | 16.97 | 10.82 |
|                  |                                 | 120 | 12.21 | 32.7  | 9.85  | 18.26 | 13.52 | 13.46 |

Note:

\*Data were obtained from scanned TLC images shown at Fig. 4a and Fig. S6 and expressed as mol% of the total PL in each sample.

\*\* : A minor band appearing above the origin in Figure 4a was considered as a contaminant of lipid extraction and was not included in the table since it was not found in the *ΔlpIT* control (+AF only) (Fig. S6).

## II. Figures

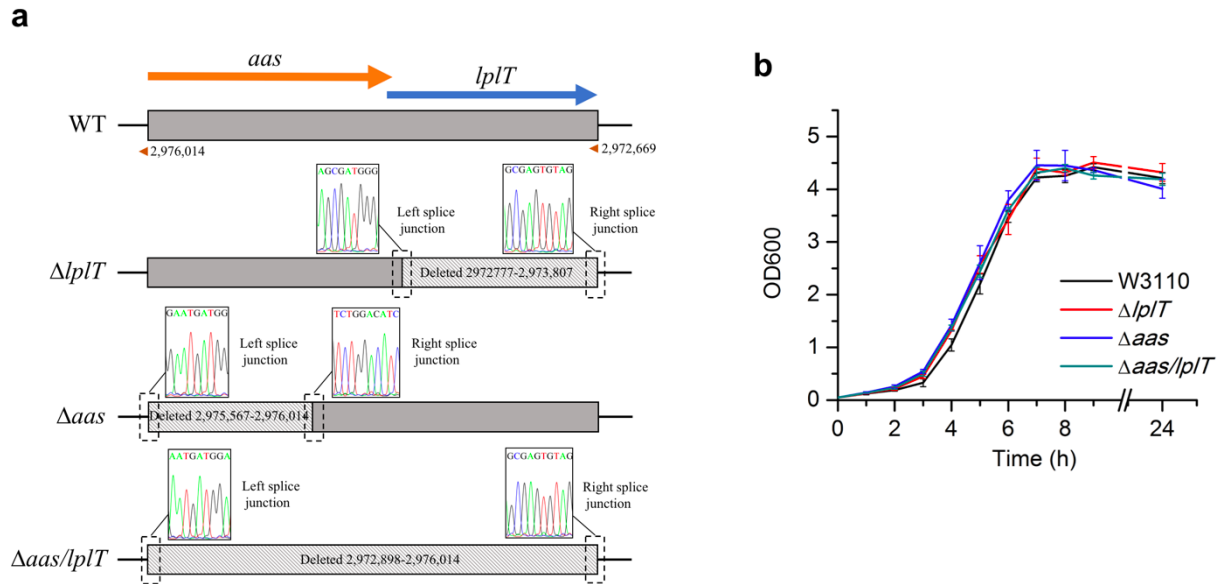

**Fig. S1. Generation of *lpIT* or/and *aas* gene knockout strains of *E. coli*.** a) scheme of the *aas-lpIT* operon in *E. coli*. The genes of *aas* and *lpIT* were under control of the same promoter and have an overlapping sequence of five terminal nucleotides. The deletion region in  $\Delta lpIT$ ,  $\Delta aas$  or  $\Delta aas/lpIT$  strain was highlighted with wide downward diagonal. The DNA splice junctions were confirmed by DNA sequencing as shown in the chromatography traces.; b) growth curve of *E. coli* W3110 WT,  $\Delta lpIT$ ,  $\Delta aas$  and  $\Delta aas/lpIT$  strains. The four *E. coli* strains were incubated in LB broth at 37 °C with shaking and absorbance was measured at OD<sub>600</sub> at indicated times.

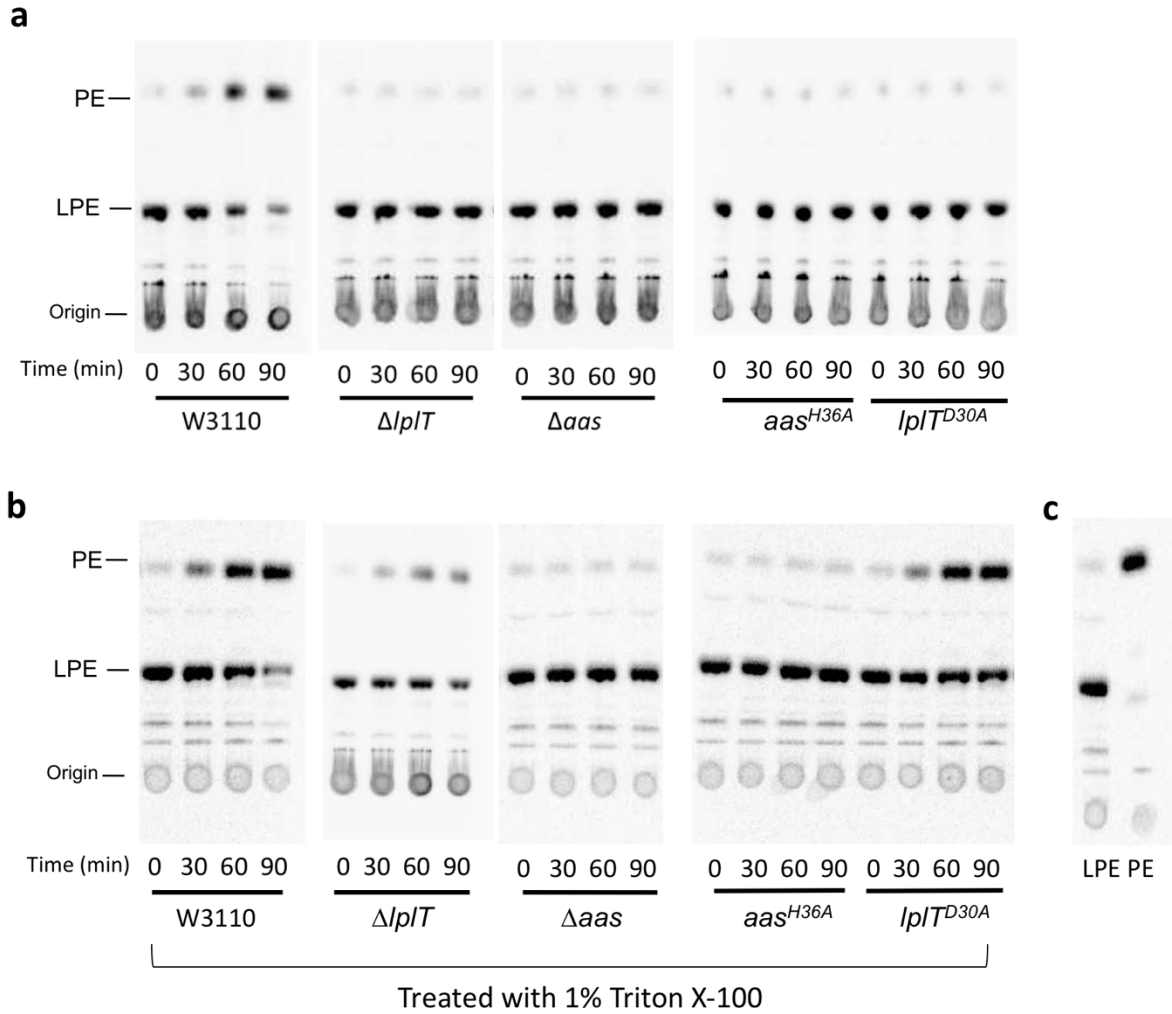

**Fig. S2. LPE acylation assays.** a) TLC images of [ $^{32}\text{P}$ ] LPE acylation reactions using spheroplasts generated from *E. coli* WT,  $\Delta lptI$ ,  $\Delta aas$ ,  $aas^{H36A}$  and  $lpt^{D30A}$  cells. The reactions were sampled at indicated times for lipid extraction and TLC analysis. b) TLC analysis of the reactions performed using spheroplasts solubilized by 1% Triton X-100. c) [ $^{32}\text{P}$ ] LPE substrate used in the assays and [ $^{32}\text{P}$ ] PE extracted from *E. coli* UE54 strain.

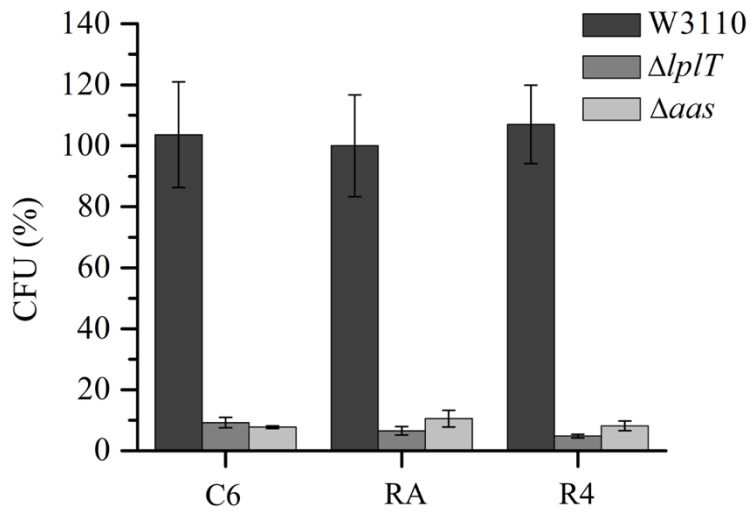

**Fig. S3. Viability tests of *E. coli* WT,  $\Delta lplT$  and  $\Delta aas$  with three different AF.**  $\sim 10^6$  of *E. coli* cells harvested at log phase were treated with 12 units psPLA<sub>2</sub> and 20  $\mu$ L of each AF: C6, RA or R4 for 90 min. Data are expressed as percentage of CFU compared to that of W3110 WT (- AF, - psPLA<sub>2</sub>). Values are means  $\pm$  S.D. of 3 or more repeated experiments.

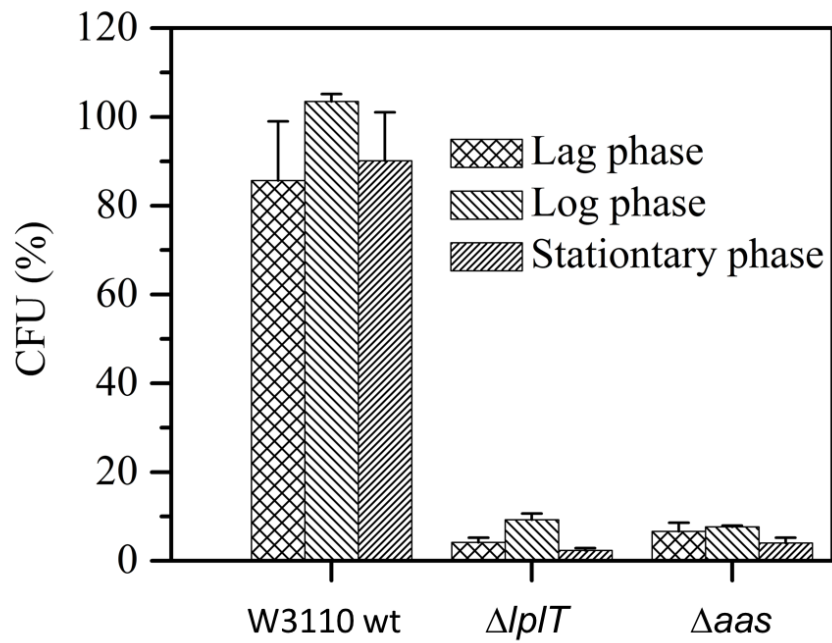

**Fig. S4. Viability tests of *E. coli* WT,  $\Delta lpIT$  and  $\Delta aas$  at different cell growth stages.**  $\sim 10^6$  of *E. coli* cells harvested at lag, log or stationary phase were treated with 12 units psPLA<sub>2</sub> and 20  $\mu$ l of AF for 90 min. Data are expressed as percentage of CFU compared to that of W3110 WT (- AF, - psPLA<sub>2</sub>). Values are means  $\pm$  S.D. of 3 or more repeated experiments.



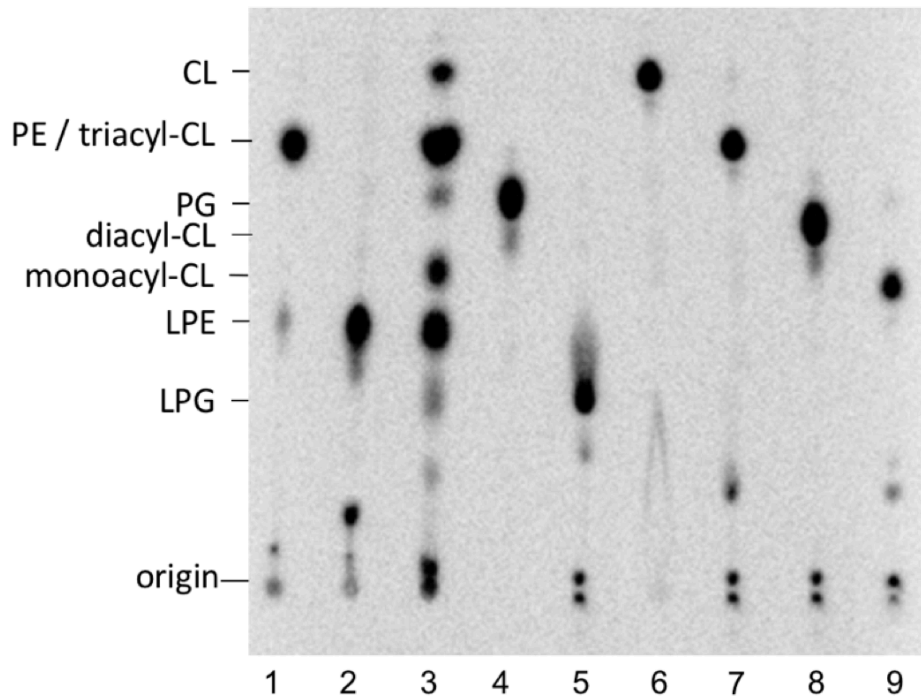

**Fig. S5. Determination of PL species in sPLA<sub>2</sub>-mediated bactericidal reaction by TLC.** 1) [<sup>32</sup>P] PE extracted from *E. coli* strain UE54; 2) [<sup>32</sup>P] LPE generated by digestion of the sample 1 using venom PLA<sub>2</sub>; 3) total lipid extract from ~10<sup>6</sup>  $\Delta lplT$  cells treated with 12 units of psPLA<sub>2</sub> and 20  $\mu$ l AF for 30 min at 37 °C; 4) [<sup>32</sup>P] PG purified from *E. coli* AL95 strain; 5) [<sup>32</sup>P] LPG generated by digestion of the sample 4 using venom PLA<sub>2</sub>; 6) [<sup>32</sup>P] CL purified from *E. coli* AL95 strain; the samples 7-9 are CL lyso-derivatives generated by venom PLA<sub>2</sub> from the sample 6 and separated by TLC. The bands corresponding to triacyl-CL (7), diacyl-CL (8), or monoacyl-CL (9) were scraped from the TLC plate, extracted using chloroform.

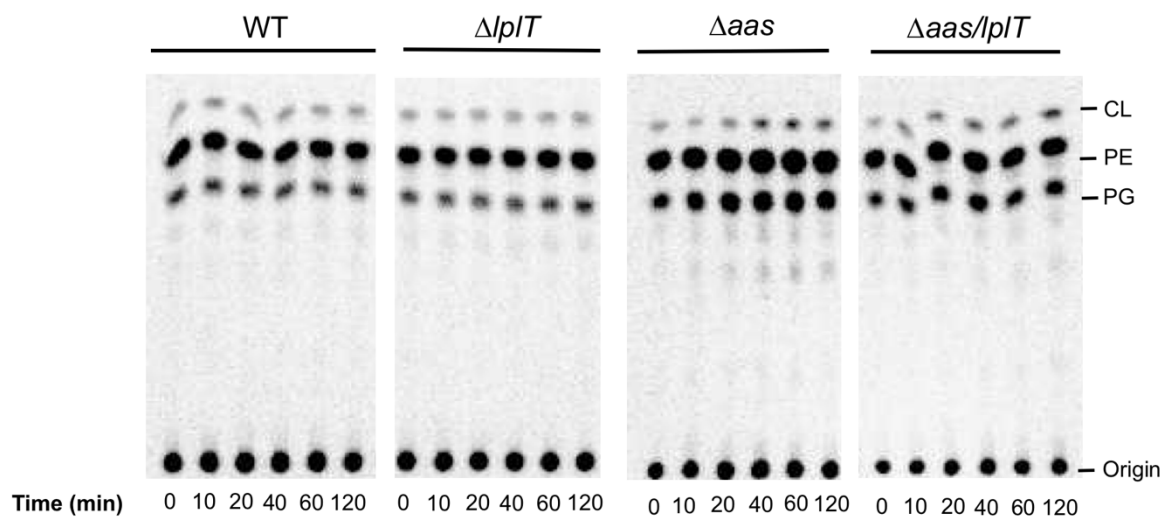

**Fig. S6.** TLC images of PL extracted from [ $^{32}\text{P}$ ] labeled *E. coli* cells of W3110 *E. coli* WT,  $\Delta lpt$ ,  $\Delta aas$  and  $\Delta aas/lpt$  strains in the absence of psPLA<sub>2</sub>. The cells were treated with 20  $\mu\text{l}$  of AF for indicated times prior to lipid extraction as described in Experimental Approaches. Individual PL content is expressed as mol% of total PL in each sample.

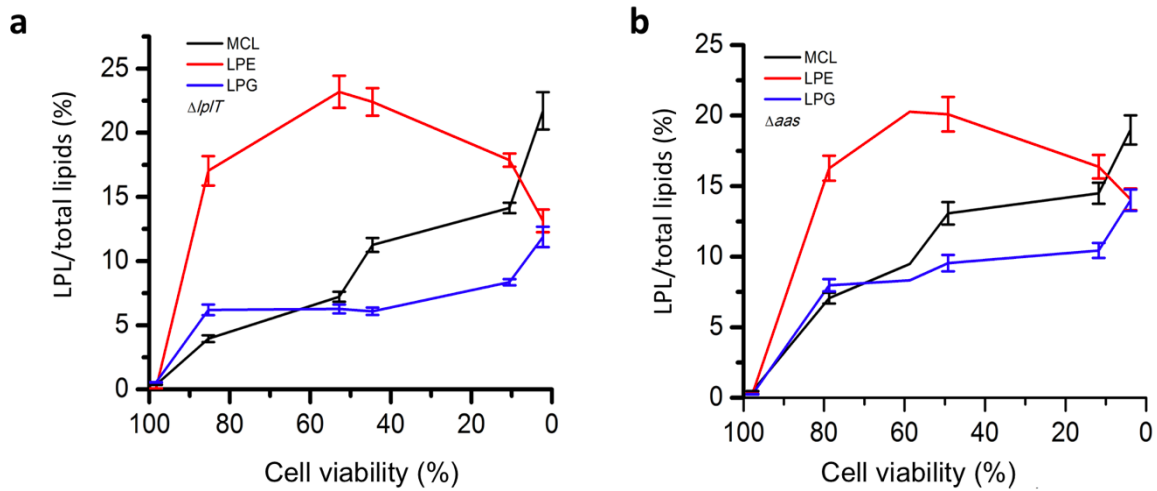

**Fig. S7. Cell viability vs degradation of individual PL in the psPLA2-mediated bactericidal reactions.** a)  $\Delta lplT$  strain; b)  $\Delta aas$  strain. Each LPL (LPE, LPG or monoacyl-CL (MCL)) was expressed as mol% in the total radiolabeled PL pool. The data were obtained from Table S2. The viability (%) was calculated by comparing CFU of W3110 WT control (- AF, - psPLA<sub>2</sub>).

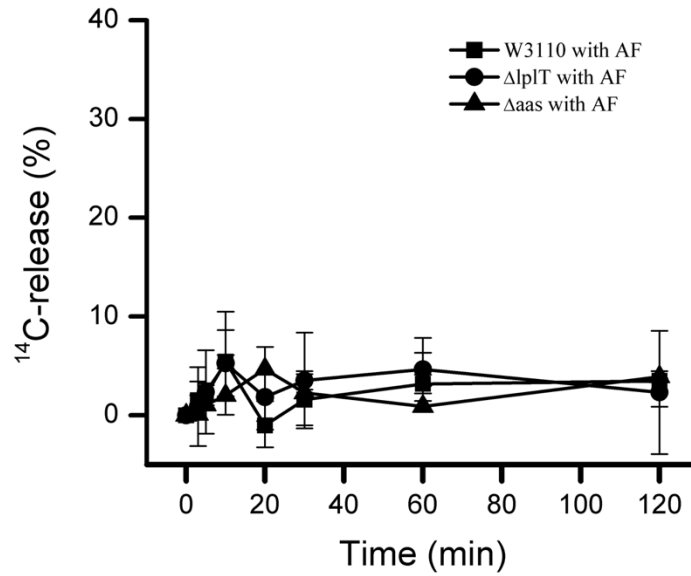

**Fig. S8. No detectable free fatty acid released from *E. coli* WT,  $\Delta lplT$  or  $\Delta aas$  strain in the absence of sPLA<sub>2</sub>.** Free fatty acid release assay of *E. coli* W3110 WT,  $\Delta lplT$  and  $\Delta aas$  cells.  $\sim 10^6$  *E. coli* cells labelled with [<sup>14</sup>C] oleic acid were incubated with 20  $\mu$ L AF for indicated times. The radioactivity in the supernatant fraction was determined by scintillation counting. PL degradation is expressed as the % of total [<sup>14</sup>C] radioactivity.

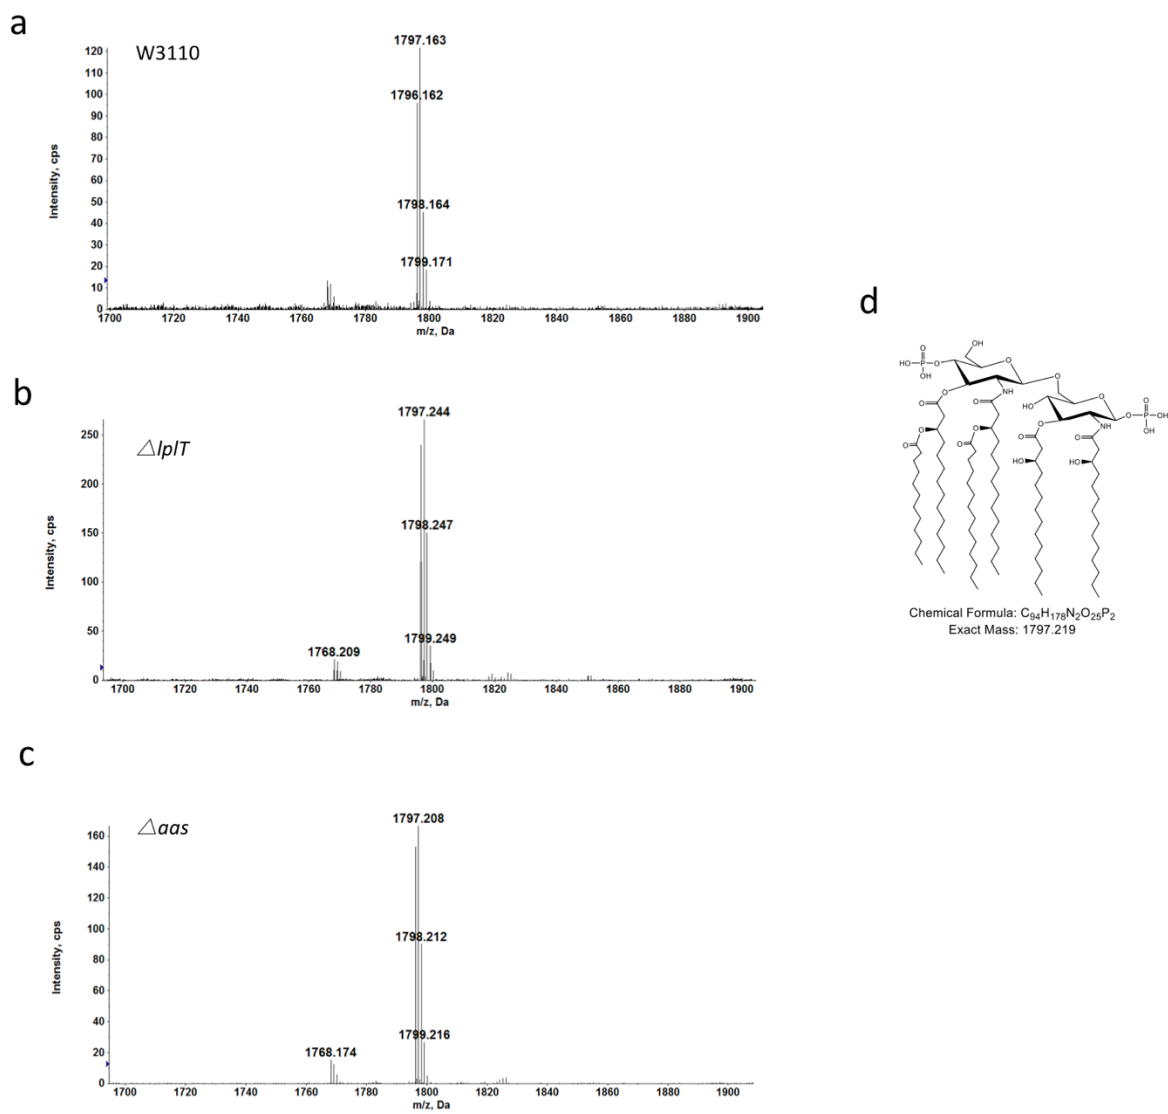

**Fig. S9. LC-ESI mass spec analysis of lipid A isolated from *E. coli*. a) W3110 WT; b)  $\Delta lpIT$ ; c)  $\Delta aas$  strain. d) the chemical structure of lipid A based on mass spec results.**
